# Supplementary material for: miR-140-5p alleviates mouse liver ischemia/reperfusion injury by targeting CAPN1
Source: PubMed Central journal article supplement — Mol Med Rep. 2021 Jul 22;24(3):675. doi: 10.3892/mmr.2021.12314 (PMC8335737; doi:10.3892/mmr.2021.12314), 2021-07-22

Figure S1. Effect of miR-140-5p mimic/inhibitor and NC on the viability of AML12 cells under normal conditions. Cell Counting Kit-8 assay was used to detect cell viability 48 h after transfection with miR-140-5p mimics and mimics NC. miR, microRNA; NC, negative control.

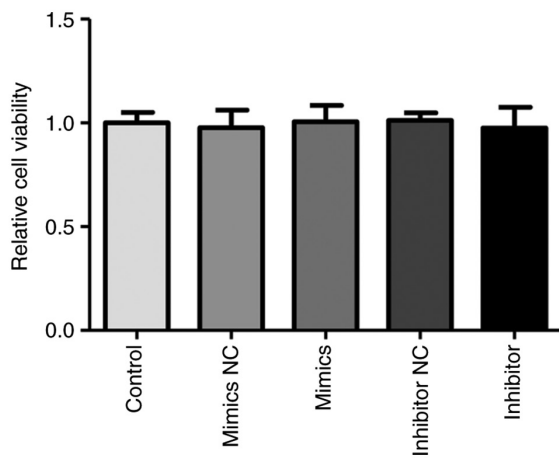

Figure S2. Prediction of miR-140-5p targets. (A) StarBase version 2.0, miRDB, and TargetScan version 7.2 were used to predict potential targets of miR-140-5p. (B) Common targets predicted by the three databases. (C-G) miR-140-5p and target gene mRNA expression detection after transfection with miR-140-5p mimic and NC. \*P<0.05 and \*\*P<0.01 vs. the mimics NC group. CAPN1, calpain 1; miR, microRNA; NC, negative control.

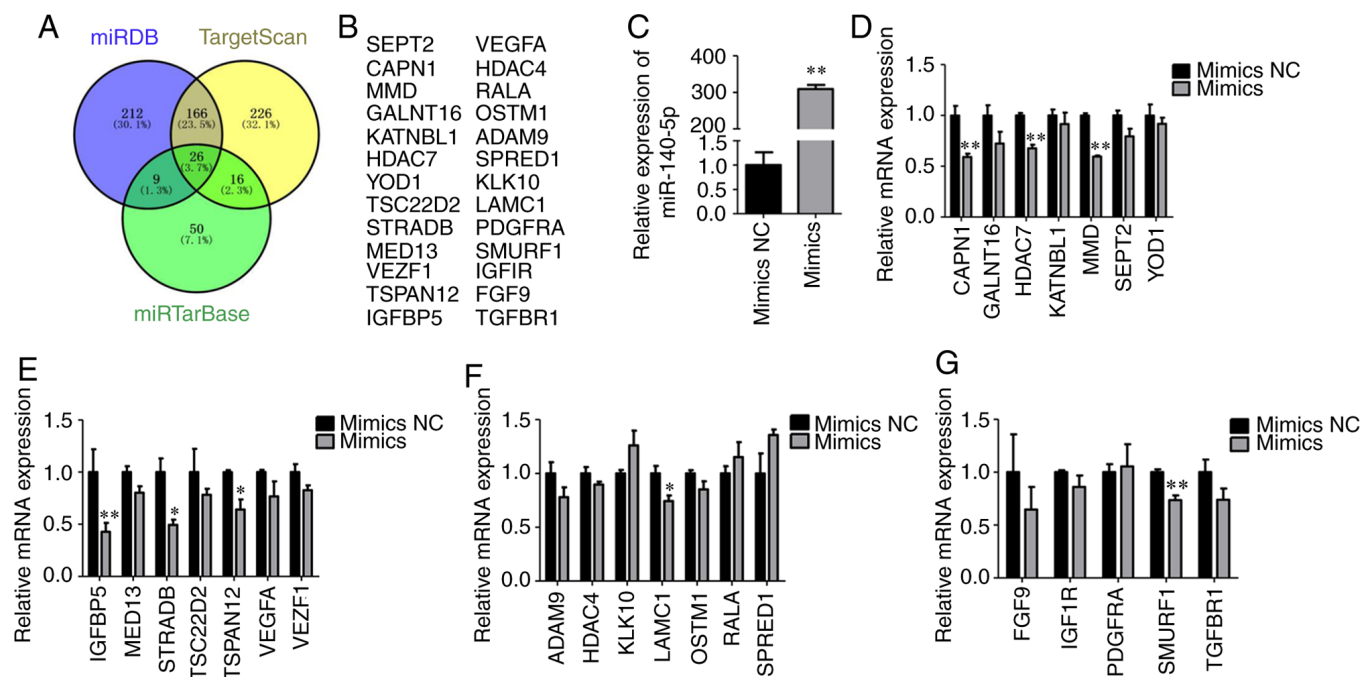

Figure S3. Detection of CAPN1 expression in AML12 cells after transfection with CAPN1 overexpressing plasmid or vector. \*\*P<0.01 vs. the vector group. CAPN1, calpain 1.

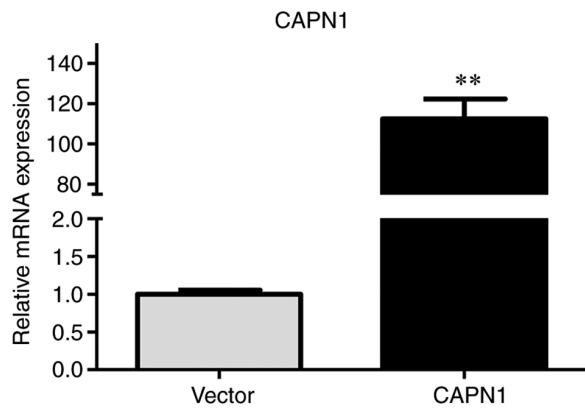

Supplement: Supplementary_Data.pdf [file Supplementary_Data.pdf]
